# Supplementary material
Source: PubMed Central journal article supplement (PMC1679783)
Supplement: 7400817-s1.pdf [file 7400817-s1.pdf]

## SUPPLEMENTAL FIGURE LEGENDS

FigS1: Alignment of the 5' (A) and 3' (B) region of the alternatively edited sequence L07 (red) with the fully edited COXIII sequence (black). Shown are the alternative start codon UUG in L07, the AUG in COXIII as well as the predicted peptide sequence and the termination codon UAA. Lower case denotes insertional editing event.

FigS2. Peptides used for production of AEP-1 antisera. Two peptides were synthesized based on the predicted amino acid sequence of AEP-1 (underlined sequences). Both AEP-1 and AEP-1b are unique 19 amino acid peptides with no similarity to other trypanosome proteins. The predicted amino acid sequence for AEP-1 was derived from the trypanosome mitochondrial cDNA clone L07. A schematic of this mRNA (L07 mRNA) is shown to illustrate sequence encoded by pre-edited (gray), junction (red) and edited mRNA (black).

|           |                                                                                       |                        |            |
|-----------|---------------------------------------------------------------------------------------|------------------------|------------|
|           | 1                                                                                     |                        | 60         |
| COXIII    | UUAUUGAGGAUUGUUUAAAAUUGAAUAuAuuAuuAuuuuuuuu <u>AuG</u> uuuuuuGuuuC-----GuuGuAuAuuu... |                        |            |
| L07       | ---UUGAGGAUUGUUUAAAAUUGAAUA-A--A--A-----A-G-----G---CUUU <u>UUG</u> --G-A-A-----...   |                        |            |
| COXIII    |                                                                                       | <u>M</u> F L F R C I F |            |
| L07 AEP-1 |                                                                                       |                        | <u>L</u> E |

  

|           |                                                                                       |
|-----------|---------------------------------------------------------------------------------------|
|           | 962                                                                                   |
| COXIII    | ...uuuuuAuuGCGAuuuGuuuAuuuuGAuGuuuuAuGuGuuAuGuAuuuGuGuGu <u>GuAA</u> uuuuuAuuGGuGu... |
| L07       | ...uuuuuAuuGCGAuuuGuuuAuuuuGAuGuuuuAuGuGuuAuGuAuuuGuGuGu <u>GuAA</u> uuuuuAuuGGuGu... |
| COXIII    | F L L R F V Y F D V L C V M Y L C V *                                                 |
| L07 AEP-1 | F L L R F V Y F D V L C V M Y L C V *                                                 |

Fig S1

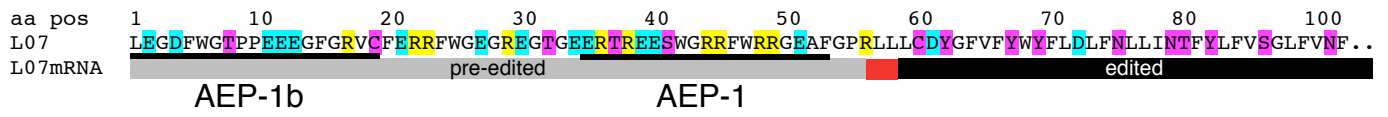

Fig S2
